# Supplementary material for: A naphthalimide-based turn-on fluorescence probe for peroxynitrite detection and imaging in living cells
Source: Royal Society of Chemistry journal article supplement (doi:10.1039/d0ra06564a), 2020-01-01
Supplement: d0ra06564a1.pdf [file d0ra06564a1.pdf]

## ***Supporting Information***

# **A Naphthalimide-Based Turn-on Fluorescent Probe for Peroxynitrite Detection and Imaging in Living Cells**

Xiling Liu,<sup>b</sup> Fangyuan Gu,<sup>c</sup> Xinyi Zhou,<sup>c</sup> Wei Zhou,<sup>\*a</sup> Shuping Zhang,<sup>b</sup> Lei Cui,<sup>c</sup> Ting Guo<sup>\*a</sup>

<sup>a</sup> College of Pharmaceutical Sciences, Southwest University, Chongqing 400715, China

<sup>b</sup> College of Science, University of Shanghai for Science and Technology, Shanghai 200093, China

<sup>c</sup> College of Science, Shanghai University, Shanghai 200444, China

### **Contents**

|                                                                                                           |          |
|-----------------------------------------------------------------------------------------------------------|----------|
| <b>1. Experiment</b> .....                                                                                | <b>1</b> |
| <b>1.1 Preparation of reactive oxygen species (ROS)</b> .....                                             | <b>1</b> |
| <b>1.2 The limit of detection (LOD) of HCA-OH</b> .....                                                   | <b>1</b> |
| <b>2. UV-Vis absorption spectra</b> .....                                                                 | <b>2</b> |
| <b>3. Time-dependent changes in the fluorescence intensity</b> .....                                      | <b>3</b> |
| <b>4. LC-MS spectroscopy</b> .....                                                                        | <b>4</b> |
| <b>5. Effects of pH</b> .....                                                                             | <b>5</b> |
| <b>6. Cytotoxicity assays</b> .....                                                                       | <b>5</b> |
| <b>7. Crystal data and structure refinement for HCA-OH</b> .....                                          | <b>6</b> |
| <b>8. Optimization result "coordinate data" calculated by Density Functional Theory (TD-DFT)</b><br>..... | <b>6</b> |
| <b>9. NMR and HRMS spectra</b> .....                                                                      | <b>9</b> |

# 1. Experiment

## 1.1 Preparation of reactive oxygen species (ROS)

Peroxynitrite solution ( $\text{ONOO}^-$ ) was synthesized as reported literature. Briefly, hydrogen peroxide (0.7 M, 1.5 mL) was acidified with hydrochloric acid (0.6 M, 1.5 mL) under ice-water bath, sodium nitrite (0.6 M, 3 mL) and sodium hydroxide (1.5 M, 3 mL) was added simultaneously in 1-2 s. The solution turned bright yellow. Then a small amount of  $\text{MnO}_2$  was added to remove excess hydrogen peroxide. The prepared  $\text{ONOO}^-$  package is stored at  $-20\text{ }^\circ\text{C}$ . The concentration of peroxynitrite was estimated by using an extinction coefficient of  $1670\text{ M}^{-1}\text{ cm}^{-1}$  at 302 nm.  $C_{\text{ONOO}^-} = (\text{Abs}_{302\text{ nm}} / 1670) * \text{dilution factor}$ .<sup>1</sup> Hydrogen peroxide ( $\text{H}_2\text{O}_2$ ), hypochlorite ( $\text{ClO}^-$ ), sodium nitrite ( $\text{NaNO}_2$ ) and tert-butyl hydroperoxide (t-BuOOH) were delivered from commercial aqueous solutions, respectively. Nitric oxide (NO) was used from a stock solution prepared by sodium nitroprusside. Singlet oxygen ( $^1\text{O}_2$ ) was generated in situ by addition of the  $\text{H}_2\text{O}_2$  stock solution into a solution containing 10 equiv. of HClO. Superoxide solution ( $\text{O}_2^{\bullet-}$ ) was prepared by adding  $\text{KO}_2$  into dry dimethyl sulfoxide (DMSO) and stirring vigorously for 10 min. Hydroxyl radicals ( $\bullet\text{OH}$ ) was generated by Fenton reaction,  $\text{FeCl}_2$  was added in the presence of 10 equiv.  $\text{H}_2\text{O}_2$ .

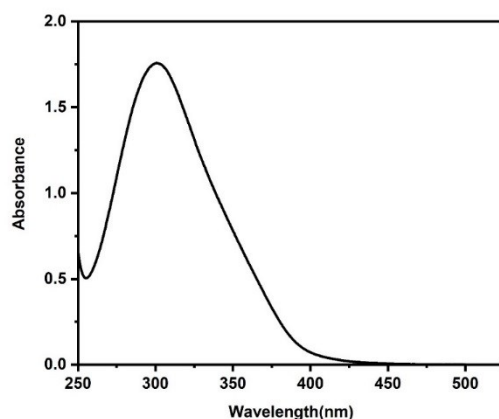

Fig. S1 Absorption spectrum of peroxynitrite

## 1.2 The limit of detection (LOD) of HCA-OH

The emission spectrum of free HCA-OH in PBS buffer (10 mM, pH 7.4, containing 1% DMSO) was collected for 11 times to confirm the background noise  $\sigma$ . The probe noise can be calculated from fluorescence signals in solution without  $\text{ONOO}^-$  using the root-mean-square ( $\sigma$ ), we took 11 data points to obtain the average value before treated with  $\text{ONOO}^-$ .

$$Vx^2 = \sum (y_i - y)^2$$

Where  $y_i$  is the average value from calculation and  $y$  is the measured data point. The  $\sigma$  noise is calculated as

$$\sigma = \sqrt{Vx^2 / N}$$

Where N is the number of data points used for the average value.

$$\text{LOD} = 3\sigma/K$$

The linear regression curve was then fitted according to the data in the range of  $\text{ONOO}^-$  from 10 to 80  $\mu\text{M}$  and obtained the slope of the curve (7.83  $\mu\text{M}$ ). The detection limit was determined to be 49.7 nM, which facilitate the quantitative detection of  $\text{ONOO}^-$  in the complex environment.<sup>2</sup>

## 2. UV-Vis absorption spectra

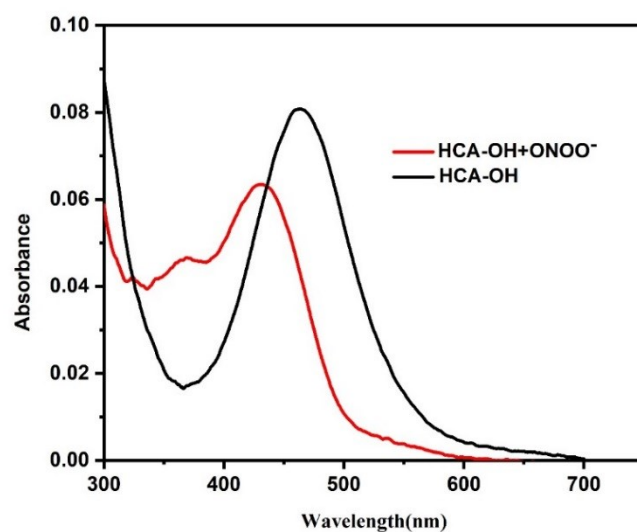

**Fig. S2** UV -Vis absorption spectra of **HCA-OH** (black), **HCA-OH** with  $\text{ONOO}^-$  (red line). The final concentration of the probe was 10  $\mu\text{M}$  and  $\text{ONOO}^-$  concentrations was 50  $\mu\text{M}$ . Data was acquired in 10 mM PBS buffer (pH 7.4, 1% DMSO) after incubation at 37 °C for 20 min.

### 3. Time-dependent changes in the fluorescence intensity

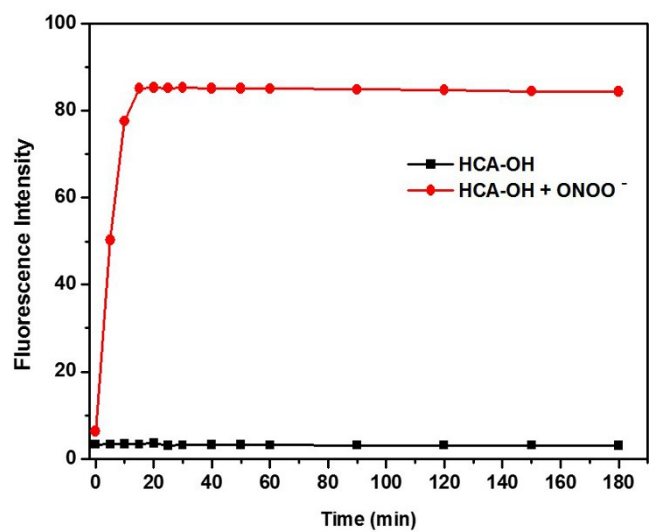

**Fig. S3** Time-dependent changes in the fluorescence intensity of **HCA-OH** (black line: 0  $\mu\text{M}$   $\text{ONOO}^-$ , red line: 30  $\mu\text{M}$   $\text{ONOO}^-$ ). The excitation and emission wavelength were 460 nm and 548 nm, respectively.

#### 4. LC-MS spectroscopy

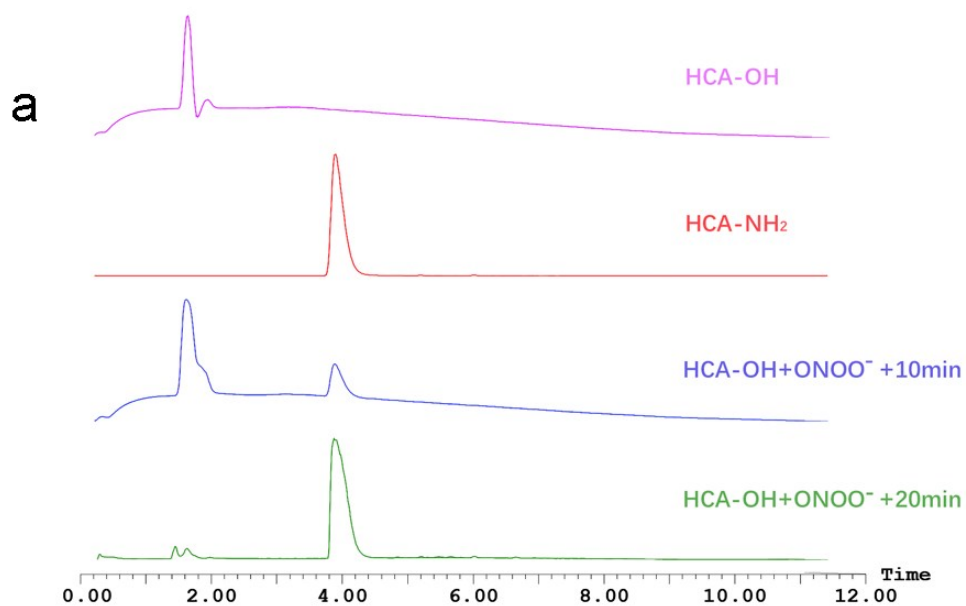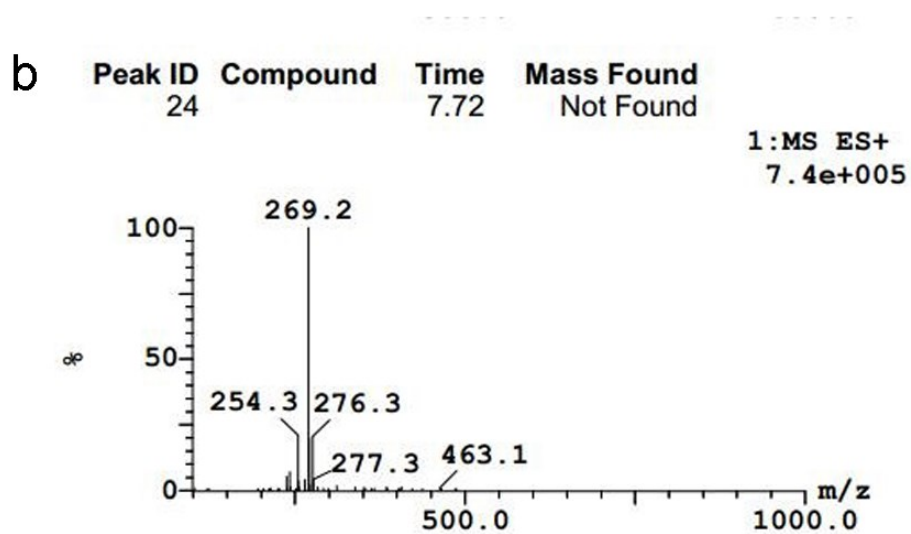

**Fig. S4** (a) HPLC traces of **HCA-OH** (purple line), **HCA-NH<sub>2</sub>** (red line), **HCA-OH** reaction with ONOO<sup>-</sup> for 10 min (blue line) and 20 min (green line). (b) ESI-MS spectrum of **HCA-OH** after treated with ONOO<sup>-</sup>.

## 5. Effects of pH

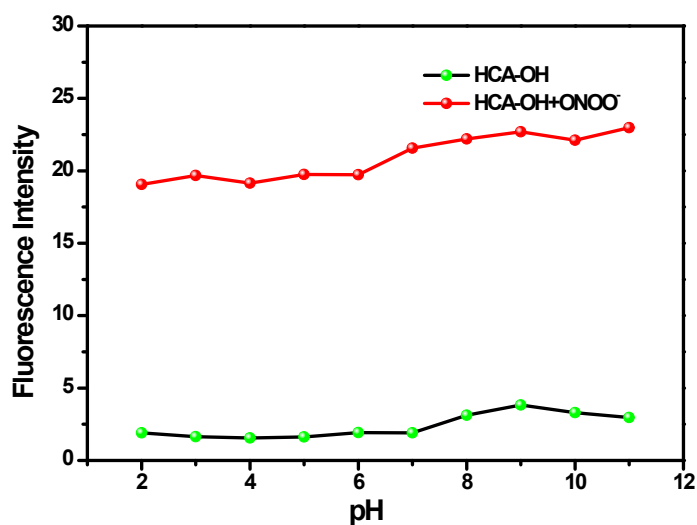

**Fig. S5** Fluorescence intensity changes of **HCA-OH** (10  $\mu$ M) towards **ONOO<sup>-</sup>** (10  $\mu$ M) in PBS buffer with 1% DMSO under different pH conditions (2.0, 3.0, 4.0, 5.0, 6.0, 7.0, 8.0, 9.0, 10.0, 11.0). The excitation and emission wavelengths were 460 nm and 548 nm, respectively.

## 6. Cytotoxicity assays

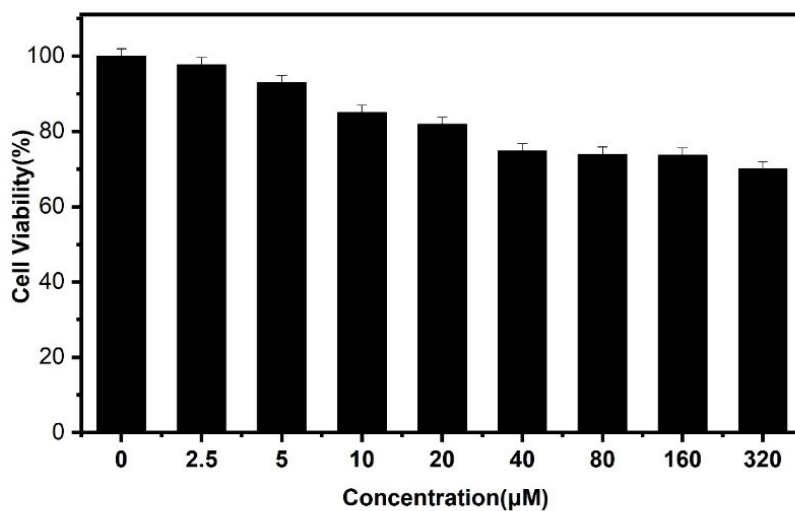

**Fig. S6** MTT assays of HepG2 cells

## 7. Crystal data and structure refinement for HCA-OH

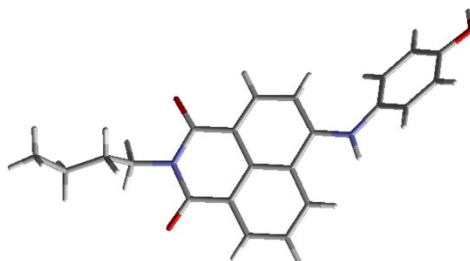

**Fig. S7** The crystal structure of **HCA-OH**

**Table S1** Crystal data and structure refinement for **HCA-OH**

| Compound                                    | <b>HCA-OH</b>                                                                                        |
|---------------------------------------------|------------------------------------------------------------------------------------------------------|
| Empirical formula                           | C <sub>22</sub> H <sub>22</sub> N <sub>2</sub> O <sub>4</sub>                                        |
| CCDC                                        | 1974831                                                                                              |
| Formula weight                              | 378.41                                                                                               |
| Crystal system, space group                 | Monoclinic, P2 <sub>1</sub> /c                                                                       |
| Unit cell dimensions (Å, °)                 | a = 13.7287(13) Å    a = 90°.<br>b = 18.656(2) Å    b = 105.962 (6)°.<br>c = 7.4592(7) Å    g = 90°. |
| Volume/ Å <sup>3</sup>                      | 1836.8(3) Å <sup>3</sup>                                                                             |
| Z, Calculated density                       | 4, 1.368 Mg/m <sup>3</sup>                                                                           |
| Absorption coefficient/mm <sup>-1</sup>     | 0.493                                                                                                |
| F (000)                                     | 800                                                                                                  |
| Theta range for data collection/            | 2.913 to 52.995.                                                                                     |
| Goodness-of-fit on F <sup>2</sup>           | 0.960                                                                                                |
| Final R indices [I > 2σ]                    | R1 = 0.0616, wR2 = 0.1407                                                                            |
| Large diff. peak and hole/e Å <sup>-3</sup> | 0.235 and -0.236 e.                                                                                  |

## 8. Optimization result "coordinate data" calculated by Density Functional Theory (TD-DFT)

**Table S2** Density Functional Theory (TD-DFT) optimized coordinate data  
Ground state (S<sub>0</sub>) :

Standard orientation:

| Center<br>Number | Atomic<br>Number | Atomic<br>Type | Coordinates (Angstroms) |           |           |
|------------------|------------------|----------------|-------------------------|-----------|-----------|
|                  |                  |                | X                       | Y         | Z         |
| 1                | 6                | 0              | 2.176516                | -0.812352 | -1.000887 |
| 2                | 6                | 0              | 0.833450                | -0.310541 | -0.977437 |
| 3                | 6                | 0              | -0.218009               | -1.094082 | -1.477238 |
| 4                | 6                | 0              | 0.565784                | 0.987011  | -0.442086 |
| 5                | 6                | 0              | 1.626995                | 1.776242  | 0.067336  |
| 6                | 6                | 0              | 2.975005                | 1.244910  | 0.030579  |
| 7                | 6                | 0              | 1.351145                | 3.036721  | 0.590209  |
| 8                | 1                | 0              | 2.169364                | 3.647265  | 0.984053  |
| 9                | 6                | 0              | 0.041924                | 3.519015  | 0.616908  |
| 10               | 6                | 0              | -1.003795               | 2.756402  | 0.121421  |
| 11               | 6                | 0              | -0.760783               | 1.483823  | -0.418224 |
| 12               | 6                | 0              | -1.814676               | 0.661707  | -0.946212 |
| 13               | 6                | 0              | -1.552962               | -0.571639 | -1.447331 |
| 14               | 1                | 0              | -2.355483               | -1.202772 | -1.841710 |
| 15               | 1                | 0              | -0.161036               | 4.510203  | 1.035430  |
| 16               | 1                | 0              | -2.027356               | 3.141470  | 0.151531  |
| 17               | 1                | 0              | -0.025555               | -2.067936 | -1.877693 |
| 18               | 7                | 0              | 3.233870                | 0.003774  | -0.480661 |
| 19               | 7                | 0              | -3.173114               | 1.210120  | -0.918445 |
| 20               | 1                | 0              | -3.478647               | 1.385296  | -1.854729 |
| 21               | 6                | 0              | -4.103973               | 0.288774  | -0.273282 |
| 22               | 6                | 0              | -4.809312               | -0.644977 | -1.029322 |
| 23               | 6                | 0              | -4.291931               | 0.348910  | 1.105404  |
| 24               | 6                | 0              | -5.699333               | -1.517879 | -0.408265 |
| 25               | 1                | 0              | -4.660835               | -0.693173 | -2.113236 |
| 26               | 6                | 0              | -5.182495               | -0.522337 | 1.726522  |
| 27               | 1                | 0              | -3.739155               | 1.083887  | 1.698559  |
| 28               | 6                | 0              | -5.885728               | -1.455552 | 0.969811  |
| 29               | 1                | 0              | -6.250723               | -2.253186 | -1.002616 |
| 30               | 1                | 0              | -5.332961               | -0.475089 | 2.809217  |
| 31               | 6                | 0              | 3.908701                | -0.800045 | 0.560693  |
| 32               | 6                | 0              | 5.348489                | -1.056468 | 0.186858  |
| 33               | 1                | 0              | 3.359934                | -1.756367 | 0.675477  |
| 34               | 1                | 0              | 3.849266                | -0.246334 | 1.519221  |
| 35               | 6                | 0              | 6.065008                | -1.881599 | 1.239953  |
| 36               | 1                | 0              | 5.390941                | -1.586992 | -0.792098 |
| 37               | 1                | 0              | 5.879499                | -0.082546 | 0.077579  |
| 38               | 6                | 0              | 7.506556                | -2.137670 | 0.867156  |
| 39               | 1                | 0              | 6.020881                | -1.350261 | 2.219347  |



|    |   |   |           |           |           |
|----|---|---|-----------|-----------|-----------|
| 40 | 1 | 0 | 5.534885  | -2.853835 | 1.371605  |
| 41 | 1 | 0 | 8.009891  | -2.742158 | 1.650442  |
| 42 | 1 | 0 | 7.572080  | -2.688973 | -0.094496 |
| 43 | 1 | 0 | 8.059837  | -1.181373 | 0.755689  |
| 44 | 8 | 0 | 3.962946  | 1.995141  | 0.508361  |
| 45 | 8 | 0 | 2.448011  | -2.008984 | -1.491825 |
| 46 | 8 | 0 | -6.787754 | -2.338278 | 1.609534  |
| 47 | 1 | 0 | -7.685214 | -2.057673 | 1.438207  |

Excited state ( $S_1$ ) :

Standard orientation:

| Center<br>Number | Atomic<br>Number | Atomic<br>Type | Coordinates (Angstroms) |           |           |
|------------------|------------------|----------------|-------------------------|-----------|-----------|
|                  |                  |                | X                       | Y         | Z         |
| 1                | 6                | 0              | -1.380305               | 2.177788  | 0.051124  |
| 2                | 6                | 0              | -0.898273               | 1.006176  | -0.578418 |
| 3                | 6                | 0              | -1.699636               | 0.050207  | -1.262358 |
| 4                | 6                | 0              | -0.504581               | 3.047067  | 0.713123  |
| 5                | 6                | 0              | 0.520405                | 0.735786  | -0.540025 |
| 6                | 6                | 0              | 1.377769                | 1.634668  | 0.143960  |
| 7                | 6                | 0              | 0.856677                | 2.784815  | 0.770126  |
| 8                | 6                | 0              | 2.816041                | 1.379106  | 0.208610  |
| 9                | 6                | 0              | 2.478858                | -0.703374 | -1.134734 |
| 10               | 6                | 0              | 1.047376                | -0.420142 | -1.179509 |
| 11               | 6                | 0              | 0.197614                | -1.314052 | -1.864991 |
| 12               | 6                | 0              | -1.164762               | -1.072044 | -1.910573 |
| 13               | 1                | 0              | -1.827889               | -1.751770 | -2.439595 |
| 14               | 1                | 0              | 0.638967                | -2.181103 | -2.341465 |
| 15               | 1                | 0              | -0.902972               | 3.941011  | 1.186892  |
| 16               | 1                | 0              | 1.547554                | 3.444835  | 1.281913  |
| 17               | 1                | 0              | -2.439166               | 2.414755  | 0.020736  |
| 18               | 8                | 0              | 3.608846                | 2.116187  | 0.807270  |
| 19               | 8                | 0              | 2.986873                | -1.705562 | -1.656463 |
| 20               | 7                | 0              | 3.281849                | 0.231710  | -0.458859 |
| 21               | 6                | 0              | 4.726694                | -0.028403 | -0.416844 |
| 22               | 6                | 0              | 5.140416                | -0.867606 | 0.797188  |
| 23               | 1                | 0              | 5.223453                | 0.942976  | -0.388258 |
| 24               | 1                | 0              | 4.982640                | -0.550720 | -1.340313 |
| 25               | 6                | 0              | 6.651251                | -1.125882 | 0.837622  |
| 26               | 1                | 0              | 4.829709                | -0.342901 | 1.709605  |
| 27               | 1                | 0              | 4.601248                | -1.823049 | 0.765490  |
| 28               | 6                | 0              | 7.083307                | -1.965497 | 2.044310  |

|    |   |   |           |           |           |
|----|---|---|-----------|-----------|-----------|
| 29 | 1 | 0 | 6.959065  | -1.632466 | -0.088343 |
| 30 | 1 | 0 | 7.183953  | -0.164307 | 0.852462  |
| 31 | 1 | 0 | 8.166816  | -2.133963 | 2.050522  |
| 32 | 1 | 0 | 6.817175  | -1.469405 | 2.985941  |
| 33 | 1 | 0 | 6.592906  | -2.946871 | 2.038106  |
| 34 | 7 | 0 | -3.133786 | 0.271323  | -1.361131 |
| 35 | 1 | 0 | -3.471516 | 0.814668  | -2.152310 |
| 36 | 6 | 0 | -4.063482 | -0.138329 | -0.499663 |
| 37 | 6 | 0 | -5.446695 | 0.174064  | -0.735905 |
| 38 | 6 | 0 | -3.719948 | -0.899107 | 0.670798  |
| 39 | 6 | 0 | -6.417633 | -0.243375 | 0.137222  |
| 40 | 1 | 0 | -5.714012 | 0.746642  | -1.618164 |
| 41 | 6 | 0 | -4.696477 | -1.308179 | 1.536393  |
| 42 | 1 | 0 | -2.678958 | -1.131483 | 0.845337  |
| 43 | 6 | 0 | -6.056278 | -0.989367 | 1.285763  |
| 44 | 1 | 0 | -7.461768 | -0.005317 | -0.047195 |
| 45 | 1 | 0 | -4.457903 | -1.880108 | 2.425841  |
| 46 | 8 | 0 | -6.953455 | -1.427873 | 2.177582  |
| 47 | 1 | 0 | -7.853888 | -1.160586 | 1.926304  |

## 9. NMR and HRMS spectra

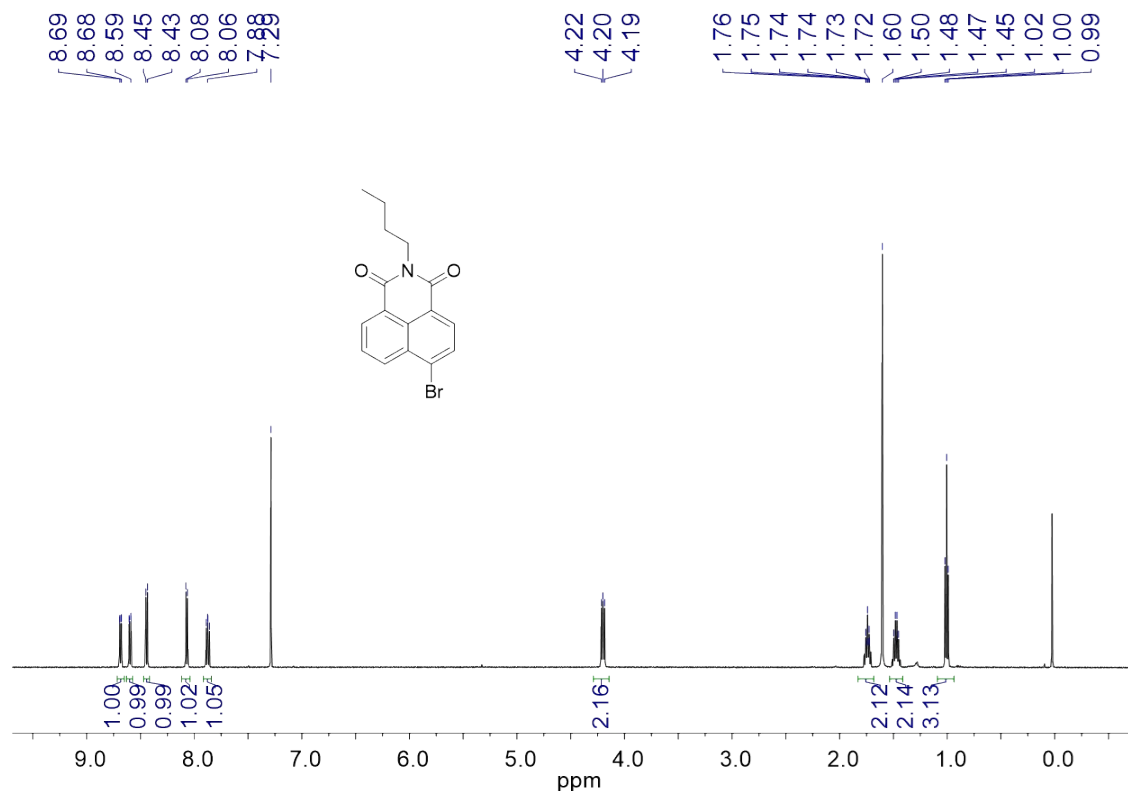

**Fig. S8** The <sup>1</sup>H-NMR spectrum of compound **1**

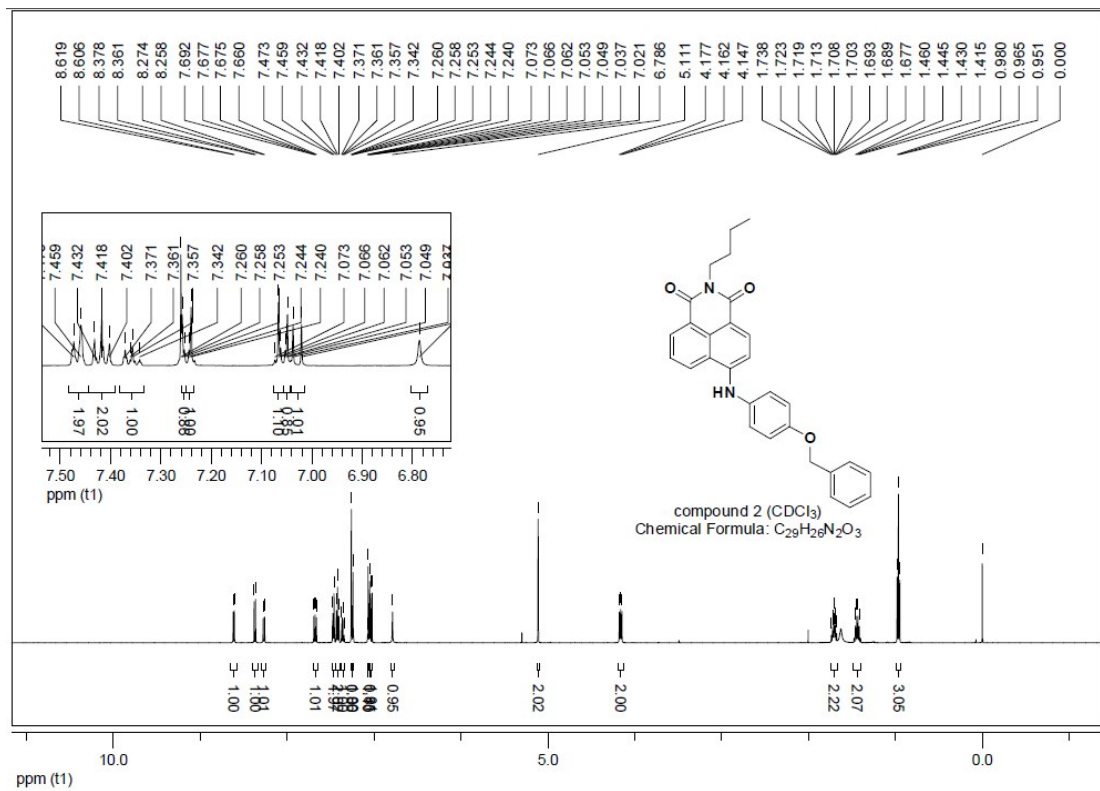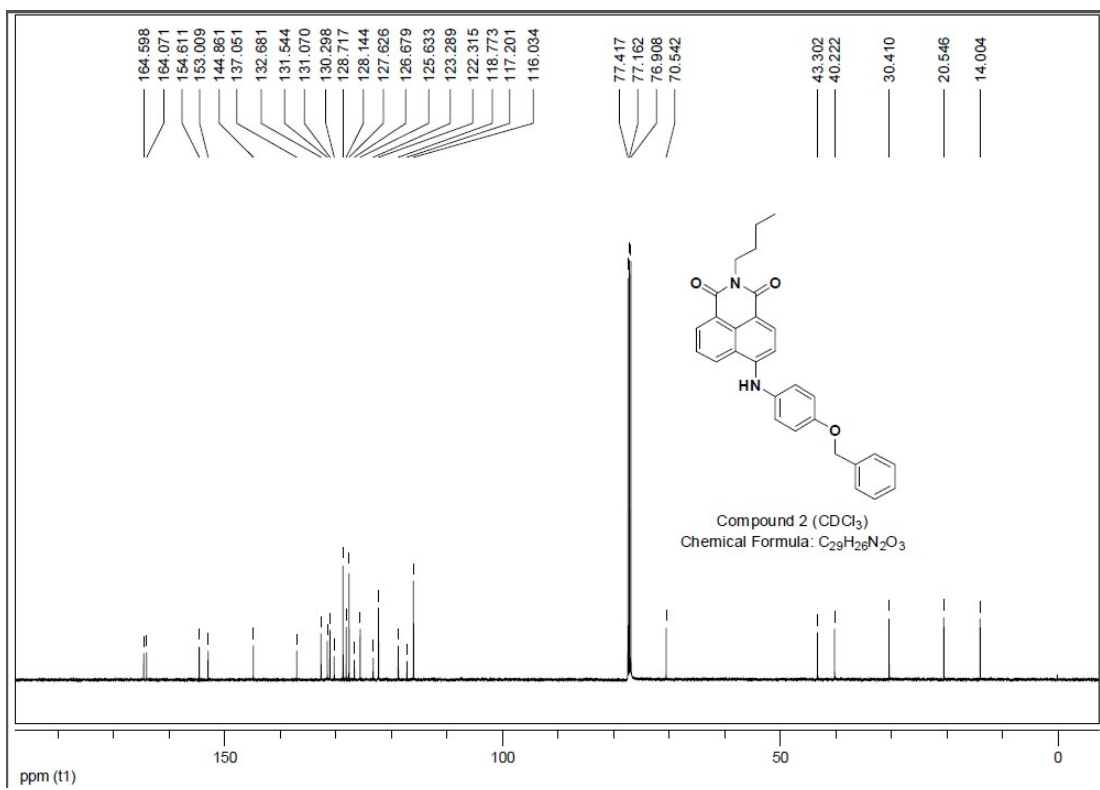

Fig. S9 The <sup>1</sup>H-NMR and <sup>13</sup>C- NMR spectrum of compound 2

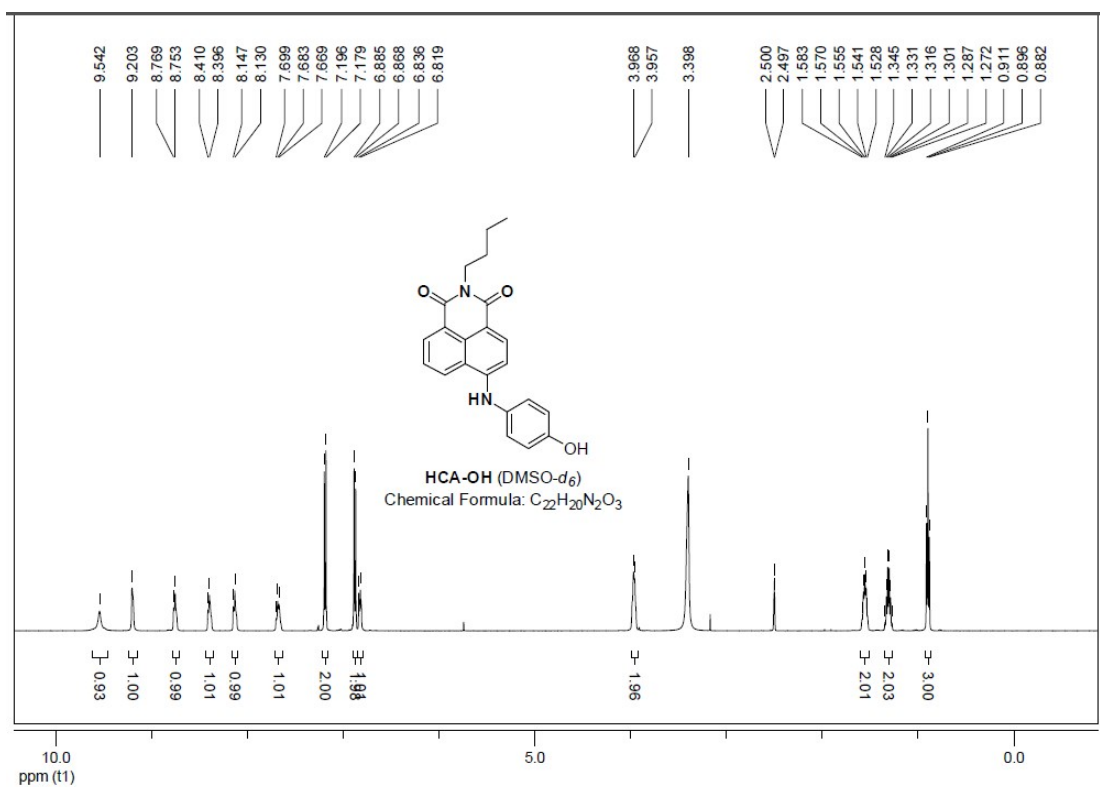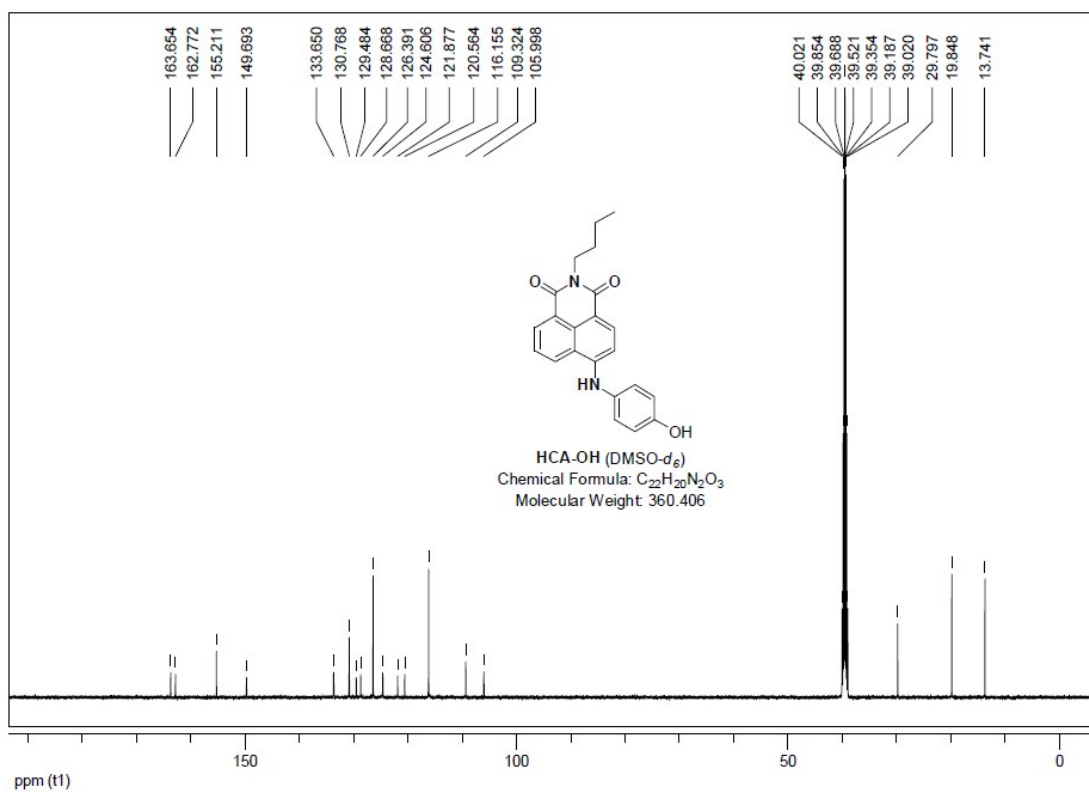

**Fig. S10** The  $^1\text{H}$ -NMR and  $^{13}\text{C}$ -NMR spectrum of **HCA-OH** in  $\text{DMSO-}d_6$

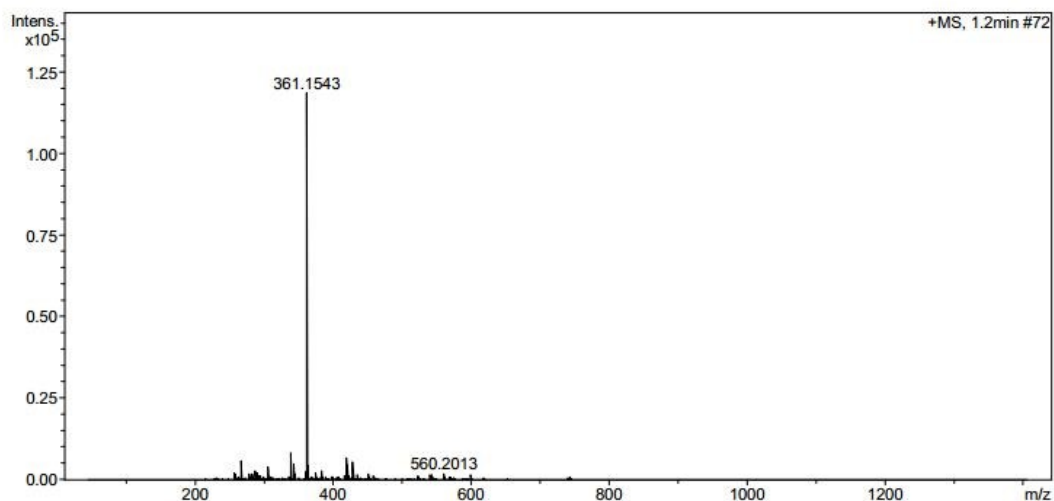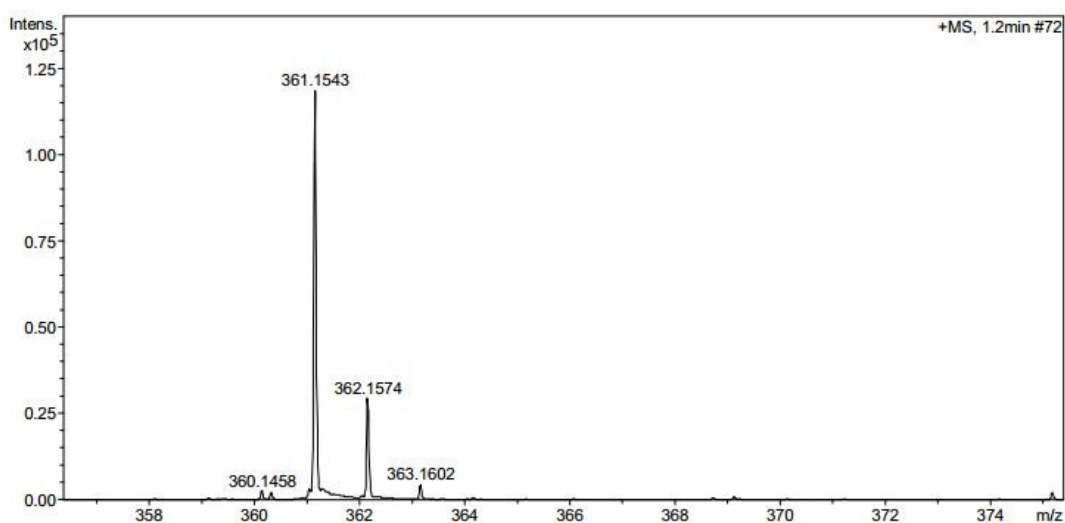

**Fig. S11** HR-MS of HCA-OH

---

1. J. S. Hu, C. Shao, X. Wang, X. Di, X. Xue, Z. Su, J. Zhao, H. L. Zhu, H. K. Liu and Y. Qian, Imaging Dynamic Peroxynitrite Fluxes in Epileptic Brains with a Near-Infrared Fluorescent Probe. *Advanced Science*, **2019**, 6(15), 1900341.

2. P. J. Ogren, A. Meetze and W. C. Duer, The Limit of Detection in Generalized Least-Squares Calibrations: An Example Using Alprazolam Liquid Chromatography-Tandem Mass Spectrometry Data. *Journal of Analytical Toxicology*, **2009**, 33(3):129-142.
